# Supplementary material for: Valence electronic structure of [EMIM][B(CN)4]: ion-pair vs. bulk description
Source: Royal Society of Chemistry journal article supplement (doi:10.1039/c9ra06762k), 2019-01-01
Supplement: c9ra06762k1.pdf [file c9ra06762k1.pdf]

# Supplementary information

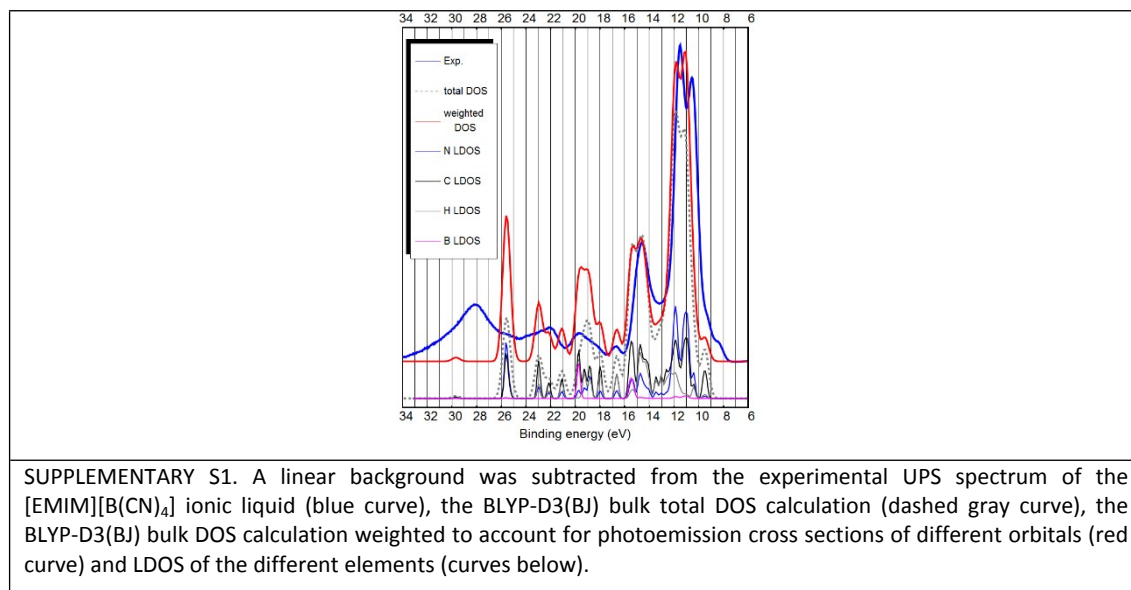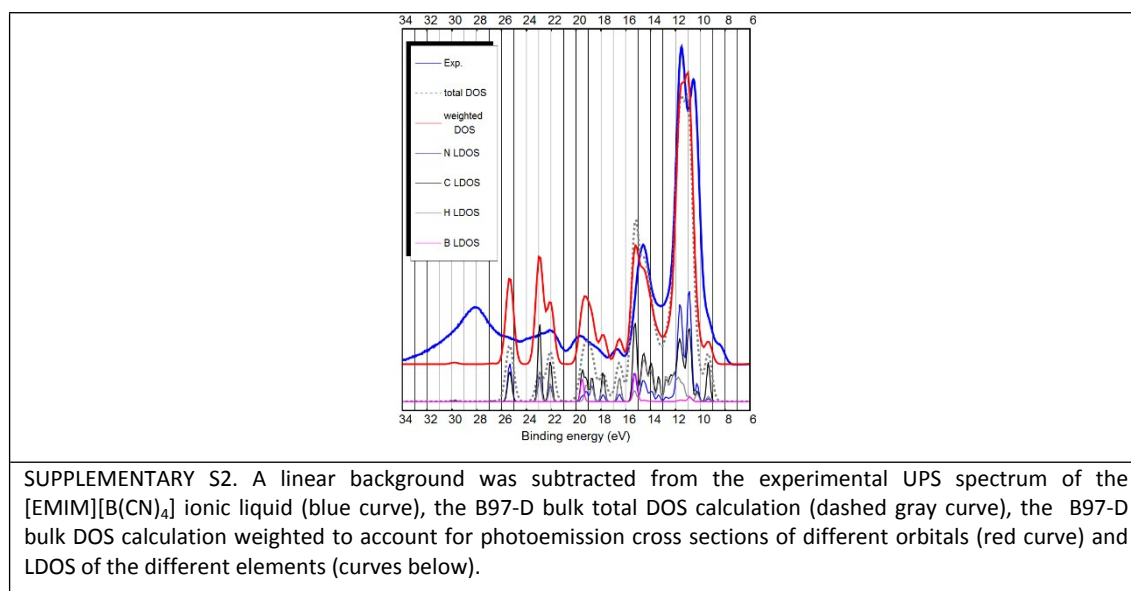

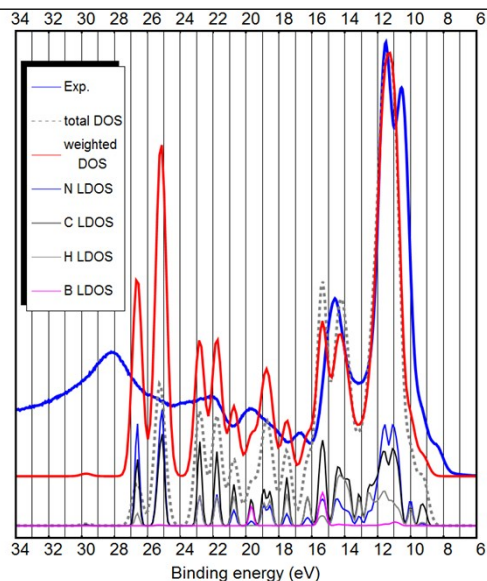

SUPPLEMENTARY S3. The experimental UPS spectrum of the [EMIM][B(CN)<sub>4</sub>] ionic liquid (blue curve), the LDA bulk total DOS calculation (dashed gray curve), the LDA bulk DOS calculation weighted to account for photoemission cross sections of different orbitals (red curve) and LDOS of the different elements (curves below).

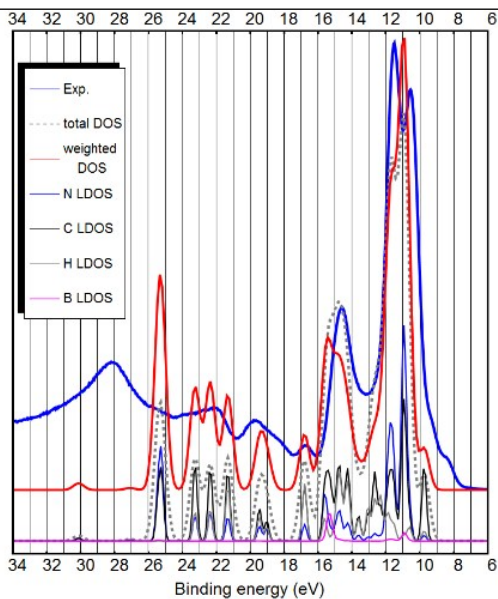

SUPPLEMENTARY S4. The experimental UPS spectrum of the [EMIM][B(CN)<sub>4</sub>] ionic liquid (blue curve), the PBE bulk total DOS calculation (dashed gray curve), the PBE bulk DOS calculation weighted to account for photoemission cross sections of different orbitals (red curve) and LDOS of the different elements (curves below).
